# Supplementary material
Source: Springer Nature journal article supplement (https://www.springermedizin.de/resource/supplementary/12891_2013_1732_MOESM2_ESM.pdf/9508430)

H

Stående

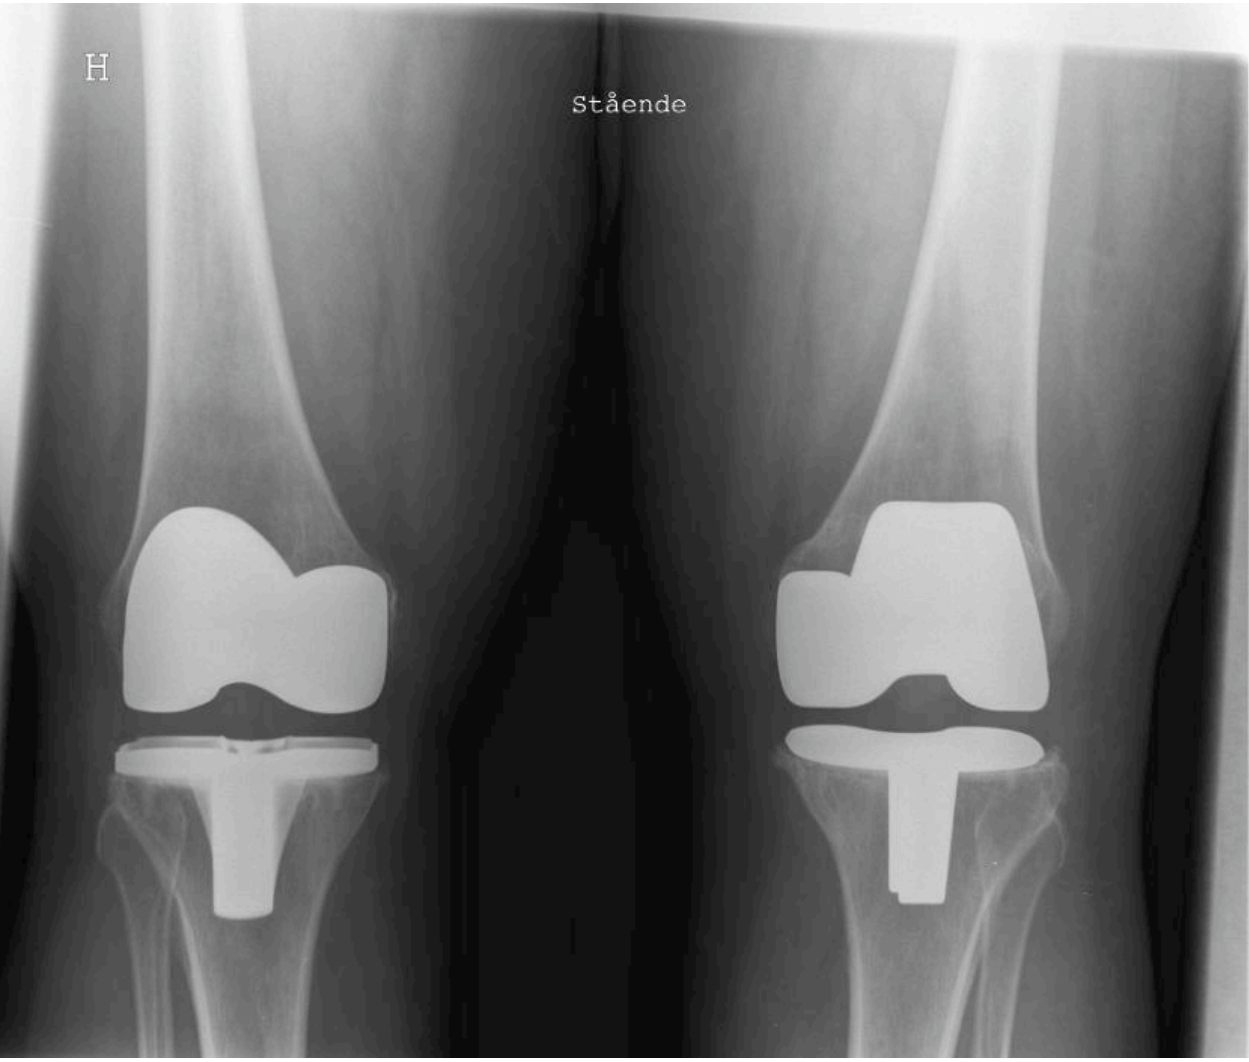

Supplement: MOESM2 [file 9508430]
